# Supplementary material for: People's interest in brain health testing: Findings from an international, online cross-sectional survey
Source: Frontiers journal article supplement (doi:10.3389/fpubh.2022.998302), 2022-10-20
Supplement: Data_Sheet_1.pdf [file Data_Sheet_1.pdf]

# LIFEBRAIN GLOBAL BRAIN HEALTH SURVEY

## TABLE OF CONTENTS:

|                                                                                                                                                                                                                  |           |
|------------------------------------------------------------------------------------------------------------------------------------------------------------------------------------------------------------------|-----------|
| <b>Table of contents:</b> .....                                                                                                                                                                                  | <b>1</b>  |
| <b>SELECTED COMPARISONS OF BINARY VS. CONTINUOUS OUTCOME MODELS.....</b>                                                                                                                                         | <b>3</b>  |
| <b>Table 1: Question 1 (Imagine a simple brain health test to learn about risk of developing a brain disease, would you wish to take such a test?): Comparison of binary vs. continuous outcome models. ....</b> | <b>3</b>  |
| <b>Table 2: Question 2 (Would you take a test even if it provides information about a disease that cannot be prevented or treated?): Comparison of binary vs. continuous outcome models.....</b>                 | <b>4</b>  |
| <b>Table 3: Question 5 (Imagine you undergo a brain health test, and it shows that you have a risk of developing brain disease): Comparison of binary vs. continuous outcome models. ....</b>                    | <b>5</b>  |
| <b>DESCRIPTIVE OUTCOME OF SUB-QUESTIONS WITH ODDS RATIOS AND CONFIDENCE INTERVALS</b>                                                                                                                            | <b>6</b>  |
| <b>Table 4: Question 1 Imagine a simple brain health test to learn about risk of developing a brain disease. Would you wish to take such a test?.....</b>                                                        | <b>6</b>  |
| <b>Table 5: Question 2 (Would you take a test even if it provides information about a disease that cannot be prevented or treated?) .....</b>                                                                    | <b>7</b>  |
| <b>Table 6: Question 3a (Why would you take a brain health test? - To get information about my cognitive and mental health) .....</b>                                                                            | <b>8</b>  |
| <b>Table 7: Question 3b (Why would you take a brain health test? - To determine my risk of developing a brain disease) .....</b>                                                                                 | <b>9</b>  |
| <b>Table 8: Question 3c (Why would you take a brain health test? - To respond if I am at risk, e.g. change my lifestyle, seek counselling, or start treatment) .....</b>                                         | <b>10</b> |
| <b>Table 9: Question 3d (Why would you take a brain health test? - To prepare myself for the future (e.g. inform my family about the risk).....</b>                                                              | <b>11</b> |
| <b>Table 10: Question 3e (Why would you take a brain health test? – For another reason) .....</b>                                                                                                                | <b>12</b> |
| <b>Table 11: Question 4a (Why would you not take a brain health test? - I do not want to worry about something that may not happen) .....</b>                                                                    | <b>13</b> |

|                                                                                                                                                                                                                                          |           |
|------------------------------------------------------------------------------------------------------------------------------------------------------------------------------------------------------------------------------------------|-----------|
| <b>Table 12: Question 4b (Why would you not take a brain health test? - I do not want to know about a disease that could not be prevented or treated) .....</b>                                                                          | <b>14</b> |
| <b>Table 13 Question 4c (Why would you not take a brain health test? - I would be frightened by the result).....</b>                                                                                                                     | <b>15</b> |
| <b>Table 14: Question 4d (Why would you not take a brain health test? - There is nothing I can do for my brain health anyway).....</b>                                                                                                   | <b>16</b> |
| <b>Table 15: Question 4e (Why would you not take a brain health test? – For other reasons) .....</b>                                                                                                                                     | <b>17</b> |
| <b>Table 16: Question 5a (Imagine you undergo a brain health test, and it shows that you have a risk of developing brain disease. What would be your most likely reaction? - I would seek professional help (e.g., my doctor)) .....</b> | <b>18</b> |
| <b>Table 17: Question 5b (Imagine you undergo a brain health test, and it shows that you have a risk of developing brain disease. What would be your most likely reaction? - I would seek advice from family and friends) .....</b>      | <b>19</b> |
| <b>Table 18: Question 5c (Imagine you undergo a brain health test, and it shows that you have a risk of developing brain disease. What would be your most likely reaction? - I would seek information online/at the library).....</b>    | <b>20</b> |
| <b>Table 19: Question 5d (Imagine you undergo a brain health test, and it shows that you have a risk of developing brain disease. What would be your most likely reaction? - I would change my lifestyle if required).....</b>           | <b>21</b> |
| <b>Table 20: Question 5e (Imagine you undergo a brain health test, and it shows that you have a risk of developing brain disease. What would be your most likely reaction? - I would plan for the future) .....</b>                      | <b>22</b> |
| <b>Table 21: Question 6a (Brain Health Test should be affordable) .....</b>                                                                                                                                                              | <b>23</b> |
| <b>Table 22: Question 6b (Brain Health Test should be quick to take) .....</b>                                                                                                                                                           | <b>24</b> |
| <b>Table 23: Question 6c (Brain Health Test should be accurate) .....</b>                                                                                                                                                                | <b>25</b> |
| <b>Table 24: Question 6d (Brain Health Test should be painless).....</b>                                                                                                                                                                 | <b>26</b> |
| <b>Table 25: Question 6e (Brain Health Test should be subsidized by social security).....</b>                                                                                                                                            | <b>27</b> |
| <b>Table 26: Question 6f (Brain Health Test should be offered online).....</b>                                                                                                                                                           | <b>28</b> |
| <b>Table 27: Question 6g (Brain Health Test should have [other] characteristic) .....</b>                                                                                                                                                | <b>29</b> |

## SELECTED COMPARISONS OF BINARY VS. CONTINUOUS OUTCOME MODELS.

TABLE 1: QUESTION 1 (IMAGINE A SIMPLE BRAIN HEALTH TEST TO LEARN ABOUT RISK OF DEVELOPING A BRAIN DISEASE, WOULD YOU WISH TO TAKE SUCH A TEST?): COMPARISON OF BINARY VS. CONTINUOUS OUTCOME MODELS.

| Key                                       | factor        | term          | log odds | Binary models |           |         | Continuous models |           |           |         |
|-------------------------------------------|---------------|---------------|----------|---------------|-----------|---------|-------------------|-----------|-----------|---------|
|                                           |               |               |          | std.error     | statistic | p.value | beta              | std.error | statistic | p.value |
| Probability of taking a brain health test | mental health | Below average | -0.001   | 0.062         | -0.01     | 0.992   | 0.025             | 0.012     | 2.042     | 0.041   |

<sup>a</sup> Models and groups where the sign of the beta (estimate) between continuous and binary outcome measures are in opposite directions.

**TABLE 2: QUESTION 2 (WOULD YOU TAKE A TEST EVEN IF IT PROVIDES INFORMATION ABOUT A DISEASE THAT CANNOT BE PREVENTED OR TREATED?): COMPARISON OF BINARY VS. CONTINUOUS OUTCOME MODELS.**

| Key                                                                         | factor       | term   | log odds | std.error | Binary models |         | Continuous models |           |           |         |
|-----------------------------------------------------------------------------|--------------|--------|----------|-----------|---------------|---------|-------------------|-----------|-----------|---------|
|                                                                             |              |        |          |           | statistic     | p.value | beta              | std.error | statistic | p.value |
| Probability of taking a brain health test even if no treatment is available | Relationship | Stable | 0.027    | 0.037     | 0.745         | 0.456   | -0.009            | 0.009     | -1.033    | 0.302   |

<sup>a</sup> Models and groups where the sign of the beta (estimate) between continuous and binary outcome measures are in opposite directions.

**TABLE 3: QUESTION 5 (IMAGINE YOU UNDERGO A BRAIN HEALTH TEST, AND IT SHOWS THAT YOU HAVE A RISK OF DEVELOPING BRAIN DISEASE): COMPARISON OF BINARY VS. CONTINUOUS OUTCOME MODELS.**

| Key                                     | factor             | term               | Binary models |           |           |         | Continuous models |           |           |         |
|-----------------------------------------|--------------------|--------------------|---------------|-----------|-----------|---------|-------------------|-----------|-----------|---------|
|                                         |                    |                    | log odds      | std.error | statistic | p.value | beta              | std.error | statistic | p.value |
| Plan for the future                     | Age                | 41-60              | 0.077         | 0.064     | 1.201     | 0.230   | -                 | 0.008     | -         | 0.004   |
| Seek information online/ at the library | Gender             | Other/ Undisclosed | -0.098        | 0.317     | -0.311    | 0.756   | 0.015             | 0.065     | 0.227     | 0.820   |
|                                         | Illness experience | Yes                | -0.001        | 0.043     | -0.018    | 0.986   | 0.016             | 0.009     | 1.726     | 0.084   |
| Seek professional help                  | Brain disease      | Yes                | -0.070        | 0.070     | -1.002    | 0.317   | 0.003             | 0.006     | 0.512     | 0.609   |
|                                         | Caregiver          |                    |               |           |           |         |                   |           |           |         |
| Seek advice from family and friends     | Cognitive health   | Below average      | -0.057        | 0.144     | -0.395    | 0.693   | 0.000             | 0.013     | 0.015     | 0.988   |
|                                         | Relationship       | Stable             | -0.016        | 0.026     | -0.594    | 0.553   | 0.002             | 0.011     | 0.173     | 0.863   |

<sup>a</sup> Models and groups where the sign of the beta (estimate) between continuous and binary outcome measures are in opposite directions.

## DESCRIPTIVE OUTCOME OF SUB-QUESTIONS WITH ODDS RATIOS AND CONFIDENCE INTERVALS

TABLE 4: QUESTION 1 IMAGINE A SIMPLE BRAIN HEALTH TEST TO LEARN ABOUT RISK OF DEVELOPING A BRAIN DISEASE. WOULD YOU WISH TO TAKE SUCH A TEST?

| Group                             | Positive Response | n      | OR   | Lower CI (99%) | Upper CI (99%) |
|-----------------------------------|-------------------|--------|------|----------------|----------------|
| <b>Age</b>                        |                   |        |      |                |                |
| >= 61                             | 11 812 (92.6%)    | 12 760 |      |                |                |
| <= 40                             | 4 007 (89.0%)     | 4 502  | 0.65 | 0.56           | 0.76           |
| 41-60                             | 9 311 (90.2%)     | 10 328 | 0.73 | 0.65           | 0.83           |
| <b>Brain Disease Caregiver</b>    |                   |        |      |                |                |
| No                                | 13 399 (90.8%)    | 14 762 |      |                |                |
| Yes                               | 11 731 (91.4%)    | 12 828 | 1.09 | 0.97           | 1.21           |
| <b>Brain Research Participant</b> |                   |        |      |                |                |
| No                                | 14 129 (90.2%)    | 15 671 |      |                |                |
| Yes                               | 11 001 (92.3%)    | 11 919 | 1.31 | 1.17           | 1.46           |
| <b>Cognitive Health</b>           |                   |        |      |                |                |
| Average or above                  | 23 574 (90.9%)    | 25 929 |      |                |                |
| Below average                     | 1 556 (93.7%)     | 1 661  | 1.48 | 1.13           | 1.93           |
| <b>Education</b>                  |                   |        |      |                |                |
| Higher                            | 17 050 (90.1%)    | 18 925 |      |                |                |
| Lower                             | 8 080 (93.2%)     | 8 665  | 1.52 | 1.34           | 1.72           |
| <b>Gender</b>                     |                   |        |      |                |                |
| Woman                             | 17 660 (90.0%)    | 19 626 |      |                |                |
| Other/Undisclosed                 | 106 (80.9%)       | 131    | 0.47 | 0.27           | 0.84           |
| Man                               | 7 364 (94.0%)     | 7 833  | 1.75 | 1.52           | 2.01           |
| <b>Healthcare Experience</b>      |                   |        |      |                |                |
| No                                | 15 636 (92.2%)    | 16 955 |      |                |                |
| Yes                               | 9 494 (89.3%)     | 10 635 | 0.70 | 0.63           | 0.78           |
| <b>Illness Experience</b>         |                   |        |      |                |                |
| No                                | 14 868 (90.4%)    | 16 451 |      |                |                |
| Yes                               | 10 262 (92.1%)    | 11 139 | 1.25 | 1.11           | 1.40           |
| <b>Mental Health</b>              |                   |        |      |                |                |
| Average or above                  | 21 822 (91.1%)    | 23 958 |      |                |                |
| Below average                     | 3 308 (91.1%)     | 3 632  | 1.00 | 0.85           | 1.17           |
| <b>Relationship</b>               |                   |        |      |                |                |
| Not stable                        | 11 085 (91.0%)    | 12 177 |      |                |                |
| Stable                            | 14 045 (91.1%)    | 15 413 | 1.01 | 0.91           | 1.13           |

**TABLE 5: QUESTION 2 (WOULD YOU TAKE A TEST EVEN IF IT PROVIDES INFORMATION ABOUT A DISEASE THAT CANNOT BE PREVENTED OR TREATED?)**

| Group                             | Positive Response | n      | OR   | Lower CI (99%) | Upper CI (99%) |
|-----------------------------------|-------------------|--------|------|----------------|----------------|
| <b>Age</b>                        |                   |        |      |                |                |
| >= 61                             | 10 446 (88.4%)    | 11 812 |      |                |                |
| <= 40                             | 3 281 (81.9%)     | 4 007  | 0.59 | 0.52           | 0.67           |
| 41-60                             | 7 953 (85.4%)     | 9 311  | 0.77 | 0.69           | 0.85           |
| <b>Brain Disease</b>              |                   |        |      |                |                |
| <b>Caregiver</b>                  |                   |        |      |                |                |
| No                                | 11 423 (85.3%)    | 13 399 |      |                |                |
| Yes                               | 10 257 (87.4%)    | 11 731 | 1.20 | 1.09           | 1.32           |
| <b>Brain Research Participant</b> |                   |        |      |                |                |
| No                                | 11 951 (84.6%)    | 14 129 |      |                |                |
| Yes                               | 9 729 (88.4%)     | 11 001 | 1.39 | 1.26           | 1.54           |
| <b>Cognitive Health</b>           |                   |        |      |                |                |
| Average or above                  | 20 251 (85.9%)    | 23 574 |      |                |                |
| Below average                     | 1 429 (91.8%)     | 1 556  | 1.85 | 1.45           | 2.36           |
| <b>Education</b>                  |                   |        |      |                |                |
| Higher                            | 14 504 (85.1%)    | 17 050 |      |                |                |
| Lower                             | 7 176 (88.8%)     | 8 080  | 1.39 | 1.25           | 1.55           |
| <b>Gender</b>                     |                   |        |      |                |                |
| Woman                             | 14 922 (84.5%)    | 17 660 |      |                |                |
| Other/Undisclosed                 | 91 (85.8%)        | 106    | 1.11 | 0.54           | 2.29           |
| Man                               | 6 667 (90.5%)     | 7 364  | 1.76 | 1.56           | 1.97           |
| <b>Healthcare Experience</b>      |                   |        |      |                |                |
| No                                | 13 740 (87.9%)    | 15 636 |      |                |                |
| Yes                               | 7 940 (83.6%)     | 9 494  | 0.71 | 0.64           | 0.78           |
| <b>Illness Experience</b>         |                   |        |      |                |                |
| No                                | 12 595 (84.7%)    | 14 868 |      |                |                |
| Yes                               | 9 085 (88.5%)     | 10 262 | 1.39 | 1.26           | 1.54           |
| <b>Mental Health</b>              |                   |        |      |                |                |
| Average or above                  | 18 791 (86.1%)    | 21 822 |      |                |                |
| Below average                     | 2 889 (87.3%)     | 3 308  | 1.11 | 0.96           | 1.28           |
| <b>Relationship</b>               |                   |        |      |                |                |
| Not stable                        | 9 543 (86.1%)     | 11 085 |      |                |                |
| Stable                            | 12 137 (86.4%)    | 14 045 | 1.03 | 0.93           | 1.13           |

**TABLE 6: QUESTION 3A (WHY WOULD YOU TAKE A BRAIN HEALTH TEST? - TO GET INFORMATION ABOUT MY COGNITIVE AND MENTAL HEALTH)**

| <b>Group</b>                      | <b>Positive Response</b> | <b>n</b> | <b>OR</b> | <b>Lower CI (99%)</b> | <b>Upper CI (99%)</b> |
|-----------------------------------|--------------------------|----------|-----------|-----------------------|-----------------------|
| <b>Age</b>                        |                          |          |           |                       |                       |
| >= 61                             | 3 975 (31.2%)            | 12 760   |           |                       |                       |
| <= 40                             | 1 878 (41.7%)            | 4 502    | 1.74      | 1.58                  | 1.91                  |
| 41-60                             | 3 052 (29.6%)            | 10 328   | 0.96      | 0.89                  | 1.04                  |
| <b>Brain Disease Caregiver</b>    |                          |          |           |                       |                       |
| No                                | 5 222 (35.4%)            | 14 762   |           |                       |                       |
| Yes                               | 3 683 (28.7%)            | 12 828   | 0.72      | 0.67                  | 0.77                  |
| <b>Brain Research Participant</b> |                          |          |           |                       |                       |
| No                                | 5 239 (33.4%)            | 15 671   |           |                       |                       |
| Yes                               | 3 666 (30.8%)            | 11 919   | 0.85      | 0.79                  | 0.91                  |
| <b>Cognitive Health</b>           |                          |          |           |                       |                       |
| Average or above                  | 8 333 (32.1%)            | 25 929   |           |                       |                       |
| Below average                     | 572 (34.4%)              | 1 661    | 1.06      | 0.92                  | 1.22                  |
| <b>Education</b>                  |                          |          |           |                       |                       |
| Higher                            | 6 146 (32.5%)            | 18 925   |           |                       |                       |
| Lower                             | 2 759 (31.8%)            | 8 665    | 0.92      | 0.85                  | 0.99                  |
| <b>Gender</b>                     |                          |          |           |                       |                       |
| Woman                             | 6 077 (31.0%)            | 19 626   |           |                       |                       |
| Other/Undisclosed                 | 48 (36.6%)               | 131      | 1.58      | 0.95                  | 2.61                  |
| Man                               | 2 780 (35.5%)            | 7 833    | 1.16      | 1.07                  | 1.25                  |
| <b>Healthcare Experience</b>      |                          |          |           |                       |                       |
| No                                | 5 543 (32.7%)            | 16 955   |           |                       |                       |
| Yes                               | 3 362 (31.6%)            | 10 635   | 1.00      | 0.93                  | 1.07                  |
| <b>Illness Experience</b>         |                          |          |           |                       |                       |
| No                                | 5 190 (31.5%)            | 16 451   |           |                       |                       |
| Yes                               | 3 715 (33.4%)            | 11 139   | 1.06      | 0.99                  | 1.13                  |
| <b>Mental Health</b>              |                          |          |           |                       |                       |
| Average or above                  | 7 585 (31.7%)            | 23 958   |           |                       |                       |
| Below average                     | 1 320 (36.3%)            | 3 632    | 1.25      | 1.13                  | 1.38                  |
| <b>Relationship</b>               |                          |          |           |                       |                       |
| Not stable                        | 4 288 (35.2%)            | 12 177   |           |                       |                       |
| Stable                            | 4 617 (30.0%)            | 15 413   | 0.78      | 0.72                  | 0.83                  |



**TABLE 7: QUESTION 3B (WHY WOULD YOU TAKE A BRAIN HEALTH TEST? - TO DETERMINE MY RISK OF DEVELOPING A BRAIN DISEASE)**

| <b>Group</b>                      | <b>Positive Response</b> | <b>n</b> | <b>OR</b> | <b>Lower CI (99%)</b> | <b>Upper CI (99%)</b> |
|-----------------------------------|--------------------------|----------|-----------|-----------------------|-----------------------|
| <b>Age</b>                        |                          |          |           |                       |                       |
| >= 61                             | 4 570 (35.8%)            | 12 760   |           |                       |                       |
| <= 40                             | 1 291 (28.7%)            | 4 502    | 0.75      | 0.68                  | 0.83                  |
| 41-60                             | 3 514 (34.0%)            | 10 328   | 0.96      | 0.89                  | 1.03                  |
| <b>Brain Disease Caregiver</b>    |                          |          |           |                       |                       |
| No                                | 4 799 (32.5%)            | 14 762   |           |                       |                       |
| Yes                               | 4 576 (35.7%)            | 12 828   | 1.15      | 1.07                  | 1.23                  |
| <b>Brain Research Participant</b> |                          |          |           |                       |                       |
| No                                | 5 216 (33.3%)            | 15 671   |           |                       |                       |
| Yes                               | 4 159 (34.9%)            | 11 919   | 1.04      | 0.97                  | 1.11                  |
| <b>Cognitive Health</b>           |                          |          |           |                       |                       |
| Average or above                  | 8 794 (33.9%)            | 25 929   |           |                       |                       |
| Below average                     | 581 (35.0%)              | 1 661    | 1.00      | 0.87                  | 1.15                  |
| <b>Education</b>                  |                          |          |           |                       |                       |
| Higher                            | 6 178 (32.6%)            | 18 925   |           |                       |                       |
| Lower                             | 3 197 (36.9%)            | 8 665    | 1.15      | 1.07                  | 1.24                  |
| <b>Gender</b>                     |                          |          |           |                       |                       |
| Woman                             | 6 624 (33.8%)            | 19 626   |           |                       |                       |
| Other/Undisclosed                 | 27 (20.6%)               | 131      | 0.57      | 0.32                  | 1.01                  |
| Man                               | 2 724 (34.8%)            | 7 833    | 0.98      | 0.91                  | 1.05                  |
| <b>Healthcare Experience</b>      |                          |          |           |                       |                       |
| No                                | 5 852 (34.5%)            | 16 955   |           |                       |                       |
| Yes                               | 3 523 (33.1%)            | 10 635   | 0.99      | 0.92                  | 1.06                  |
| <b>Illness Experience</b>         |                          |          |           |                       |                       |
| No                                | 5 621 (34.2%)            | 16 451   |           |                       |                       |
| Yes                               | 3 754 (33.7%)            | 11 139   | 0.95      | 0.89                  | 1.02                  |
| <b>Mental Health</b>              |                          |          |           |                       |                       |
| Average or above                  | 8 236 (34.4%)            | 23 958   |           |                       |                       |
| Below average                     | 1 139 (31.4%)            | 3 632    | 0.87      | 0.78                  | 0.96                  |
| <b>Relationship</b>               |                          |          |           |                       |                       |
| Not stable                        | 3 961 (32.5%)            | 12 177   |           |                       |                       |
| Stable                            | 5 414 (35.1%)            | 15 413   | 1.13      | 1.05                  | 1.21                  |

**TABLE 8: QUESTION 3C (WHY WOULD YOU TAKE A BRAIN HEALTH TEST? - TO RESPOND IF I AM AT RISK, E.G. CHANGE MY LIFESTYLE, SEEK COUNSELLING, OR START TREATMENT)**

| <b>Group</b>                      | <b>Positive Response</b> | <b>n</b> | <b>OR</b> | <b>Lower CI (99%)</b> | <b>Upper CI (99%)</b> |
|-----------------------------------|--------------------------|----------|-----------|-----------------------|-----------------------|
| <b>Age</b>                        |                          |          |           |                       |                       |
| >= 61                             | 5 897 (46.2%)            | 12 760   |           |                       |                       |
| <= 40                             | 2 404 (53.4%)            | 4 502    | 1.50      | 1.37                  | 1.66                  |
| 41-60                             | 4 996 (48.4%)            | 10 328   | 1.16      | 1.08                  | 1.25                  |
| <b>Brain Disease Caregiver</b>    |                          |          |           |                       |                       |
| No                                | 7 353 (49.8%)            | 14 762   |           |                       |                       |
| Yes                               | 5 944 (46.3%)            | 12 828   | 0.84      | 0.79                  | 0.90                  |
| <b>Brain Research Participant</b> |                          |          |           |                       |                       |
| No                                | 7 561 (48.2%)            | 15 671   |           |                       |                       |
| Yes                               | 5 736 (48.1%)            | 11 919   | 0.95      | 0.89                  | 1.01                  |
| <b>Cognitive Health</b>           |                          |          |           |                       |                       |
| Average or above                  | 12 566 (48.5%)           | 25 929   |           |                       |                       |
| Below average                     | 731 (44.0%)              | 1 661    | 0.78      | 0.68                  | 0.89                  |
| <b>Education</b>                  |                          |          |           |                       |                       |
| Higher                            | 9 372 (49.5%)            | 18 925   |           |                       |                       |
| Lower                             | 3 925 (45.3%)            | 8 665    | 0.77      | 0.72                  | 0.83                  |
| <b>Gender</b>                     |                          |          |           |                       |                       |
| Woman                             | 9 373 (47.8%)            | 19 626   |           |                       |                       |
| Other/Undisclosed                 | 58 (44.3%)               | 131      | 1.07      | 0.64                  | 1.77                  |
| Man                               | 3 866 (49.4%)            | 7 833    | 0.98      | 0.91                  | 1.05                  |
| <b>Healthcare Experience</b>      |                          |          |           |                       |                       |
| No                                | 8 210 (48.4%)            | 16 955   |           |                       |                       |
| Yes                               | 5 087 (47.8%)            | 10 635   | 1.04      | 0.98                  | 1.12                  |
| <b>Illness Experience</b>         |                          |          |           |                       |                       |
| No                                | 7 981 (48.5%)            | 16 451   |           |                       |                       |
| Yes                               | 5 316 (47.7%)            | 11 139   | 0.93      | 0.87                  | 0.99                  |
| <b>Mental Health</b>              |                          |          |           |                       |                       |
| Average or above                  | 11 539 (48.2%)           | 23 958   |           |                       |                       |
| Below average                     | 1 758 (48.4%)            | 3 632    | 1.01      | 0.92                  | 1.11                  |
| <b>Relationship</b>               |                          |          |           |                       |                       |
| Not stable                        | 6 003 (49.3%)            | 12 177   |           |                       |                       |
| Stable                            | 7 294 (47.3%)            | 15 413   | 0.91      | 0.86                  | 0.98                  |

**TABLE 9: QUESTION 3D (WHY WOULD YOU TAKE A BRAIN HEALTH TEST? - TO PREPARE MYSELF FOR THE FUTURE (E.G. INFORM MY FAMILY ABOUT THE RISK))**

| <b>Group</b>                      | <b>Positive Response</b> | <b>n</b> | <b>OR</b> | <b>Lower CI (99%)</b> | <b>Upper CI (99%)</b> |
|-----------------------------------|--------------------------|----------|-----------|-----------------------|-----------------------|
| <b>Age</b>                        |                          |          |           |                       |                       |
| >= 61                             | 2 775 (21.7%)            | 12 760   |           |                       |                       |
| <= 40                             | 542 (12.0%)              | 4 502    | 0.51      | 0.45                  | 0.58                  |
| 41-60                             | 1 766 (17.1%)            | 10 328   | 0.76      | 0.70                  | 0.83                  |
| <b>Brain Disease Caregiver</b>    |                          |          |           |                       |                       |
| No                                | 2 328 (15.8%)            | 14 762   |           |                       |                       |
| Yes                               | 2 755 (21.5%)            | 12 828   | 1.46      | 1.35                  | 1.58                  |
| <b>Brain Research Participant</b> |                          |          |           |                       |                       |
| No                                | 2 432 (15.5%)            | 15 671   |           |                       |                       |
| Yes                               | 2 651 (22.2%)            | 11 919   | 1.53      | 1.41                  | 1.66                  |
| <b>Cognitive Health</b>           |                          |          |           |                       |                       |
| Average or above                  | 4 756 (18.3%)            | 25 929   |           |                       |                       |
| Below average                     | 327 (19.7%)              | 1 661    | 1.05      | 0.89                  | 1.24                  |
| <b>Education</b>                  |                          |          |           |                       |                       |
| Higher                            | 3 514 (18.6%)            | 18 925   |           |                       |                       |
| Lower                             | 1 569 (18.1%)            | 8 665    | 0.93      | 0.85                  | 1.01                  |
| <b>Gender</b>                     |                          |          |           |                       |                       |
| Woman                             | 3 620 (18.4%)            | 19 626   |           |                       |                       |
| Other/Undisclosed                 | 30 (22.9%)               | 131      | 1.53      | 0.88                  | 2.68                  |
| Man                               | 1 433 (18.3%)            | 7 833    | 0.94      | 0.86                  | 1.03                  |
| <b>Healthcare Experience</b>      |                          |          |           |                       |                       |
| No                                | 3 166 (18.7%)            | 16 955   |           |                       |                       |
| Yes                               | 1 917 (18.0%)            | 10 635   | 1.00      | 0.92                  | 1.08                  |
| <b>Illness Experience</b>         |                          |          |           |                       |                       |
| No                                | 2 919 (17.7%)            | 16 451   |           |                       |                       |
| Yes                               | 2 164 (19.4%)            | 11 139   | 1.09      | 1.01                  | 1.19                  |
| <b>Mental Health</b>              |                          |          |           |                       |                       |
| Average or above                  | 4 479 (18.7%)            | 23 958   |           |                       |                       |
| Below average                     | 604 (16.6%)              | 3 632    | 0.86      | 0.76                  | 0.98                  |
| <b>Relationship</b>               |                          |          |           |                       |                       |
| Not stable                        | 2 075 (17.0%)            | 12 177   |           |                       |                       |
| Stable                            | 3 008 (19.5%)            | 15 413   | 1.18      | 1.09                  | 1.28                  |

**TABLE 10: QUESTION 3E (WHY WOULD YOU TAKE A BRAIN HEALTH TEST? – FOR ANOTHER REASON)**

| <b>Group</b>                      | <b>Positive Response</b> | <b>n</b> | <b>OR</b> | <b>Lower CI (99%)</b> | <b>Upper CI (99%)</b> |
|-----------------------------------|--------------------------|----------|-----------|-----------------------|-----------------------|
| <b>Age</b>                        |                          |          |           |                       |                       |
| >= 61                             | 252 (2.0%)               | 12 760   |           |                       |                       |
| <= 40                             | 65 (1.4%)                | 4 502    | 0.76      | 0.53                  | 1.09                  |
| 41-60                             | 238 (2.3%)               | 10 328   | 1.20      | 0.95                  | 1.52                  |
| <b>Brain Disease Caregiver</b>    |                          |          |           |                       |                       |
| No                                | 230 (1.6%)               | 14 762   |           |                       |                       |
| Yes                               | 325 (2.5%)               | 12 828   | 1.63      | 1.30                  | 2.04                  |
| <b>Brain Research Participant</b> |                          |          |           |                       |                       |
| No                                | 297 (1.9%)               | 15 671   |           |                       |                       |
| Yes                               | 258 (2.2%)               | 11 919   | 1.12      | 0.90                  | 1.40                  |
| <b>Cognitive Health</b>           |                          |          |           |                       |                       |
| Average or above                  | 486 (1.9%)               | 25 929   |           |                       |                       |
| Below average                     | 69 (4.2%)                | 1 661    | 2.20      | 1.57                  | 3.09                  |
| <b>Education</b>                  |                          |          |           |                       |                       |
| Higher                            | 333 (1.8%)               | 18 925   |           |                       |                       |
| Lower                             | 222 (2.6%)               | 8 665    | 1.42      | 1.13                  | 1.78                  |
| <b>Gender</b>                     |                          |          |           |                       |                       |
| Woman                             | 397 (2.0%)               | 19 626   |           |                       |                       |
| Other/Undisclosed                 | 154 (2.0%)               | 7 833    | 0.93      | 0.73                  | 1.19                  |
| Man                               | 4 (3.1%)                 | 131      | 1.71      | 0.45                  | 6.39                  |
| <b>Healthcare Experience</b>      |                          |          |           |                       |                       |
| No                                | 371 (2.2%)               | 16 955   |           |                       |                       |
| Yes                               | 184 (1.7%)               | 10 635   | 0.81      | 0.64                  | 1.03                  |
| <b>Illness Experience</b>         |                          |          |           |                       |                       |
| No                                | 256 (1.6%)               | 16 451   |           |                       |                       |
| Yes                               | 299 (2.7%)               | 11 139   | 1.71      | 1.37                  | 2.14                  |
| <b>Mental Health</b>              |                          |          |           |                       |                       |
| Average or above                  | 428 (1.8%)               | 23 958   |           |                       |                       |
| Below average                     | 127 (3.5%)               | 3 632    | 2.00      | 1.53                  | 2.60                  |
| <b>Relationship</b>               |                          |          |           |                       |                       |
| Not stable                        | 249 (2.0%)               | 12 177   |           |                       |                       |
| Stable                            | 306 (2.0%)               | 15 413   | 0.97      | 0.78                  | 1.21                  |

**TABLE 11: QUESTION 4A (WHY WOULD YOU NOT TAKE A BRAIN HEALTH TEST? - I DO NOT WANT TO WORRY ABOUT SOMETHING THAT MAY NOT HAPPEN)**

| Group                             | Positive Response | n           | OR   | Lower CI (99%) | Upper CI (99%) |
|-----------------------------------|-------------------|-------------|------|----------------|----------------|
| <b>Age</b>                        |                   |             |      |                |                |
| >= 61                             | 261 (27.5%)       | 261 (27.5%) |      |                |                |
| <= 40                             | 133 (26.9%)       | 133 (26.9%) | 0.97 | 0.70           | 1.33           |
| 41-60                             | 269 (26.5%)       | 269 (26.5%) | 0.95 | 0.73           | 1.23           |
| <b>Brain Disease Caregiver</b>    |                   |             |      |                |                |
| No                                | 381 (28.0%)       | 1 363       |      |                |                |
| Yes                               | 282 (25.7%)       | 1 097       | 0.89 | 0.70           | 1.13           |
| <b>Brain Research Participant</b> |                   |             |      |                |                |
| No                                | 451 (29.2%)       | 1 542       |      |                |                |
| Yes                               | 212 (23.1%)       | 918         | 0.73 | 0.57           | 0.93           |
| <b>Cognitive Health</b>           |                   |             |      |                |                |
| Average or above                  | 638 (27.1%)       | 2 355       |      |                |                |
| Below average                     | 25 (23.8%)        | 105         | 0.84 | 0.46           | 1.54           |
| <b>Education</b>                  |                   |             |      |                |                |
| Higher                            | 464 (24.7%)       | 1 875       |      |                |                |
| Lower                             | 199 (34.0%)       | 585         | 1.57 | 1.20           | 2.04           |
| <b>Gender</b>                     |                   |             |      |                |                |
| Woman                             | 525 (26.7%)       | 1 966       |      |                |                |
| Other/Undisclosed                 | 10 (40.0%)        | 25          | 1.83 | 0.63           | 5.29           |
| Man                               | 128 (27.3%)       | 469         | 1.03 | 0.76           | 1.39           |
| <b>Healthcare Experience</b>      |                   |             |      |                |                |
| No                                | 368 (27.9%)       | 1 319       |      |                |                |
| Yes                               | 295 (25.9%)       | 1 141       | 0.90 | 0.71           | 1.14           |
| <b>Illness Experience</b>         |                   |             |      |                |                |
| No                                | 422 (26.7%)       | 1 583       |      |                |                |
| Yes                               | 241 (27.5%)       | 877         | 1.04 | 0.82           | 1.33           |
| <b>Mental Health</b>              |                   |             |      |                |                |
| Average or above                  | 580 (27.2%)       | 2 136       |      |                |                |
| Below average                     | 83 (25.6%)        | 324         | 0.92 | 0.65           | 1.31           |
| <b>Relationship</b>               |                   |             |      |                |                |
| Not stable                        | 277 (25.4%)       | 1 092       |      |                |                |
| Stable                            | 386 (28.2%)       | 1 368       | 1.16 | 0.91           | 1.47           |

**TABLE 12: QUESTION 4B (WHY WOULD YOU NOT TAKE A BRAIN HEALTH TEST? - I DO NOT WANT TO KNOW ABOUT A DISEASE THAT COULD NOT BE PREVENTED OR TREATED)**

| Group                             | Positive Response | n     | OR   | Lower CI (99%) | Upper CI (99%) |
|-----------------------------------|-------------------|-------|------|----------------|----------------|
| <b>Age</b>                        |                   |       |      |                |                |
| >= 61                             | 570 (60.1%)       | 948   |      |                |                |
| <= 40                             | 291 (58.8%)       | 495   | 0.95 | 0.71           | 1.27           |
| 41-60                             | 572 (56.2%)       | 1017  | 0.85 | 0.67           | 1.08           |
| <b>Brain Disease Caregiver</b>    |                   |       |      |                |                |
| No                                | 759 (55.7%)       | 1 363 |      |                |                |
| Yes                               | 674 (61.4%)       | 1 097 | 1.27 | 1.02           | 1.57           |
| <b>Brain Research Participant</b> |                   |       |      |                |                |
| No                                | 889 (57.7%)       | 1 542 |      |                |                |
| Yes                               | 544 (59.3%)       | 918   | 1.07 | 0.86           | 1.33           |
| <b>Cognitive Health</b>           |                   |       |      |                |                |
| Average or above                  | 1 372 (58.3%)     | 2 355 |      |                |                |
| Below average                     | 61 (58.1%)        | 105   | 0.99 | 0.59           | 1.67           |
| <b>Education</b>                  |                   |       |      |                |                |
| Higher                            | 1 144 (61.0%)     | 1 875 |      |                |                |
| Lower                             | 289 (49.4%)       | 585   | 0.62 | 0.49           | 0.80           |
| <b>Gender</b>                     |                   |       |      |                |                |
| Woman                             | 1 167 (59.4%)     | 1 966 |      |                |                |
| Other/Undisclosed                 | 8 (32.0%)         | 25    | 0.32 | 0.11           | 0.98           |
| Man                               | 258 (55.0%)       | 469   | 0.84 | 0.64           | 1.09           |
| <b>Healthcare Experience</b>      |                   |       |      |                |                |
| No                                | 747 (56.6%)       | 1 319 |      |                |                |
| Yes                               | 686 (60.1%)       | 1 141 | 1.15 | 0.93           | 1.43           |
| <b>Illness Experience</b>         |                   |       |      |                |                |
| No                                | 931 (58.8%)       | 1 583 |      |                |                |
| Yes                               | 502 (57.2%)       | 877   | 0.94 | 0.75           | 1.17           |
| <b>Mental Health</b>              |                   |       |      |                |                |
| Average or above                  | 1 241 (58.1%)     | 2 136 |      |                |                |
| Below average                     | 192 (59.3%)       | 324   | 1.05 | 0.77           | 1.43           |
| <b>Relationship</b>               |                   |       |      |                |                |
| Not stable                        | 624 (57.1%)       | 1 092 |      |                |                |
| Stable                            | 809 (59.1%)       | 1 368 | 1.09 | 0.88           | 1.34           |

**TABLE 13 QUESTION 4C (WHY WOULD YOU NOT TAKE A BRAIN HEALTH TEST? - I WOULD BE FRIGHTENED BY THE RESULT)**

| Group                             | Positive Response | n     | OR   | Lower CI (99%) | Upper CI (99%) |
|-----------------------------------|-------------------|-------|------|----------------|----------------|
| <b>Age</b>                        |                   |       |      |                |                |
| = 61                              | 84 (8.9%)         | 948   |      |                |                |
| <= 40                             | 76 (15.4%)        | 495   | 1.87 | 1.21           | 2.89           |
| 41-60                             | 120 (11.8%)       | 1 017 | 1.38 | 0.93           | 2.03           |
| <b>Brain Disease Caregiver</b>    |                   |       |      |                |                |
| No                                | 171 (12.5%)       | 1 363 |      |                |                |
| Yes                               | 109 (9.9%)        | 1 097 | 0.77 | 0.55           | 1.08           |
| <b>Brain Research Participant</b> |                   |       |      |                |                |
| No                                | 198 (12.8%)       | 1 542 |      |                |                |
| Yes                               | 82 (8.9%)         | 918   | 0.67 | 0.47           | 0.95           |
| <b>Cognitive Health</b>           |                   |       |      |                |                |
| Average or above                  | 265 (11.3%)       | 2 355 |      |                |                |
| Below average                     | 15 (14.3%)        | 105   | 1.31 | 0.63           | 2.75           |
| <b>Education</b>                  |                   |       |      |                |                |
| Higher                            | 194 (10.3%)       | 1 875 |      |                |                |
| Lower                             | 86 (14.7%)        | 585   | 1.49 | 1.04           | 2.14           |
| <b>Gender</b>                     |                   |       |      |                |                |
| Woman                             | 231 (11.7%)       | 1 966 |      |                |                |
| Other/Undisclosed                 | 4 (16.0%)         | 25    | 1.43 | 0.35           | 5.91           |
| Man                               | 45 (9.6%)         | 469   | 0.80 | 0.51           | 1.24           |
| <b>Healthcare Experience</b>      |                   |       |      |                |                |
| No                                | 161 (12.2%)       | 1 319 |      |                |                |
| Yes                               | 119 (10.4%)       | 1 141 | 0.84 | 0.60           | 1.17           |
| <b>Illness Experience</b>         |                   |       |      |                |                |
| No                                | 172 (10.9%)       | 1 583 |      |                |                |
| Yes                               | 108 (12.3%)       | 877   | 1.15 | 0.82           | 1.61           |
| <b>Mental Health</b>              |                   |       |      |                |                |
| Average or above                  | 224 (10.5%)       | 2 136 |      |                |                |
| Below average                     | 56 (17.3%)        | 324   | 1.78 | 1.17           | 2.72           |
| <b>Relationship</b>               |                   |       |      |                |                |
| Not stable                        | 118 (10.8%)       | 1 092 |      |                |                |
| Stable                            | 162 (11.8%)       | 1 368 | 1.11 | 0.80           | 1.54           |

**TABLE 14: QUESTION 4D (WHY WOULD YOU NOT TAKE A BRAIN HEALTH TEST? - THERE IS NOTHING I CAN DO FOR MY BRAIN HEALTH ANYWAY)**

| Group                             | Positive Response | n     | OR   | Lower CI (99%) | Upper CI (99%) |
|-----------------------------------|-------------------|-------|------|----------------|----------------|
| <b>Age</b>                        |                   |       |      |                |                |
| >= 61                             | 23 (2.4%)         | 948   |      |                |                |
| <= 40                             | 2 (0.4%)          | 495   | 0.16 | 0.02           | 1.10           |
| 41-60                             | 10 (1.0%)         | 1 017 | 0.40 | 0.15           | 1.07           |
| <b>Brain Disease Caregiver</b>    |                   |       |      |                |                |
| No                                | 21 (1.5%)         | 1 363 |      |                |                |
| Yes                               | 14 (1.3%)         | 1 097 | 0.83 | 0.34           | 2.02           |
| <b>Brain Research Participant</b> |                   |       |      |                |                |
| No                                | 26 (1.7%)         | 1 542 |      |                |                |
| Yes                               | 9 (1.0%)          | 918   | 0.58 | 0.21           | 1.58           |
| <b>Cognitive Health</b>           |                   |       |      |                |                |
| Average or above                  | 30 (1.3%)         | 2 355 |      |                |                |
| Below average                     | 5 (4.8%)          | 105   | 3.87 | 1.08           | 13.85          |
| <b>Education</b>                  |                   |       |      |                |                |
| Higher                            | 18 (1.0%)         | 1 875 |      |                |                |
| Lower                             | 17 (2.9%)         | 585   | 3.09 | 1.28           | 7.45           |
| <b>Gender</b>                     |                   |       |      |                |                |
| Woman                             | 19 (1.0%)         | 1 966 |      |                |                |
| Other/Undisclosed                 | 1 (4.0%)          | 25    | 4.27 | 0.29           | 63.50          |
| Man                               | 15 (3.2%)         | 469   | 3.39 | 1.37           | 8.34           |
| <b>Healthcare Experience</b>      |                   |       |      |                |                |
| No                                | 23 (1.7%)         | 1 319 |      |                |                |
| Yes                               | 12 (1.1%)         | 1 141 | 0.60 | 0.24           | 1.51           |
| <b>Illness Experience</b>         |                   |       |      |                |                |
| No                                | 24 (1.5%)         | 1 583 |      |                |                |
| Yes                               | 11 (1.3%)         | 877   | 0.83 | 0.32           | 2.12           |
| <b>Mental Health</b>              |                   |       |      |                |                |
| Average or above                  | 29 (1.4%)         | 2 136 |      |                |                |
| Below average                     | 6 (1.9%)          | 324   | 1.37 | 0.43           | 4.41           |
| <b>Relationship</b>               |                   |       |      |                |                |
| Not stable                        | 14 (1.3%)         | 1 092 |      |                |                |
| Stable                            | 21 (1.5%)         | 1 368 | 1.20 | 0.49           | 2.94           |



**TABLE 15: QUESTION 4E (WHY WOULD YOU NOT TAKE A BRAIN HEALTH TEST? – FOR OTHER REASONS)**

| <b>Group</b>                      | <b>Positive Response</b> | <b>n</b> | <b>OR</b> | <b>Lower CI (99%)</b> | <b>Upper CI (99%)</b> |
|-----------------------------------|--------------------------|----------|-----------|-----------------------|-----------------------|
| <b>Age</b>                        |                          |          |           |                       |                       |
| >= 61                             | 87 (9.2%)                | 948      |           |                       |                       |
| <= 40                             | 44 (8.9%)                | 495      | 0.97      | 0.59                  | 1.59                  |
| 41-60                             | 136 (13.4%)              | 1 017    | 1.53      | 1.05                  | 2.22                  |
| <b>Brain Disease Caregiver</b>    |                          |          |           |                       |                       |
| No                                | 156 (11.4%)              | 1 363    |           |                       |                       |
| Yes                               | 111 (10.1%)              | 1 097    | 0.87      | 0.62                  | 1.22                  |
| <b>Brain Research Participant</b> |                          |          |           |                       |                       |
| No                                | 136 (8.8%)               | 1 542    |           |                       |                       |
| Yes                               | 131 (14.3%)              | 918      | 1.72      | 1.23                  | 2.41                  |
| <b>Cognitive Health</b>           |                          |          |           |                       |                       |
| Average or above                  | 257 (10.9%)              | 2 355    |           |                       |                       |
| Below average                     | 10 (9.5%)                | 105      | 0.86      | 0.36                  | 2.06                  |
| <b>Education</b>                  |                          |          |           |                       |                       |
| Higher                            | 200 (10.7%)              | 1 875    |           |                       |                       |
| Lower                             | 67 (11.5%)               | 585      | 1.08      | 0.74                  | 1.59                  |
| <b>Gender</b>                     |                          |          |           |                       |                       |
| Woman                             | 201 (10.2%)              | 1 966    |           |                       |                       |
| Other/Undisclosed                 | 5 (20%)                  | 25       | 2.20      | 0.60                  | 8.09                  |
| Man                               | 61 (13.0%)               | 469      | 1.31      | 0.88                  | 1.96                  |
| <b>Healthcare Experience</b>      |                          |          |           |                       |                       |
| No                                | 140 (10.6%)              | 1 319    |           |                       |                       |
| Yes                               | 127 (11.1%)              | 1 141    | 1.05      | 0.75                  | 1.47                  |
| <b>Illness Experience</b>         |                          |          |           |                       |                       |
| No                                | 167 (10.5%)              | 1 583    |           |                       |                       |
| Yes                               | 100 (11.4%)              | 877      | 1.09      | 0.77                  | 1.54                  |
| <b>Mental Health</b>              |                          |          |           |                       |                       |
| Average or above                  | 242 (11.3%)              | 2 136    |           |                       |                       |
| Below average                     | 25 (7.7%)                | 324      | 0.65      | 0.37                  | 1.15                  |
| <b>Relationship</b>               |                          |          |           |                       |                       |
| Not stable                        | 143 (13.1%)              | 1 092    |           |                       |                       |
| Stable                            | 124 (9.1%)               | 1 368    | 0.66      | 0.47                  | 0.93                  |

**TABLE 16: QUESTION 5A (IMAGINE YOU UNDERGO A BRAIN HEALTH TEST, AND IT SHOWS THAT YOU HAVE A RISK OF DEVELOPING BRAIN DISEASE. WHAT WOULD BE YOUR MOST LIKELY REACTION? - I WOULD SEEK PROFESSIONAL HELP (E.G., MY DOCTOR))**

| <b>Group</b>                      | <b>Positive Response</b> | <b>n</b> | <b>OR</b> | <b>Lower CI (99%)</b> | <b>Upper CI (99%)</b> |
|-----------------------------------|--------------------------|----------|-----------|-----------------------|-----------------------|
| <b>Age</b>                        |                          |          |           |                       |                       |
| >= 61                             | 12 263 (97.7%)           | 12 550   |           |                       |                       |
| <= 40                             | 4 287 (95.6%)            | 4 484    | 0.51      | 0.40                  | 0.65                  |
| 41-60                             | 9 906 (96.6%)            | 10 259   | 0.66      | 0.53                  | 0.81                  |
| <b>Brain Disease Caregiver</b>    |                          |          |           |                       |                       |
| No                                | 14 182 (97.0%)           | 14 616   |           |                       |                       |
| Yes                               | 12 274 (96.8%)           | 12 677   | 0.93      | 0.78                  | 1.12                  |
| <b>Brain Research Participant</b> |                          |          |           |                       |                       |
| No                                | 15 026 (96.9%)           | 15 504   |           |                       |                       |
| Yes                               | 11 430 (97.0%)           | 11 789   | 1.01      | 0.84                  | 1.22                  |
| <b>Cognitive Health</b>           |                          |          |           |                       |                       |
| Average or above                  | 24 868 (96.9%)           | 25 652   |           |                       |                       |
| Below average                     | 1 588 (96.8%)            | 1 641    | 0.94      | 0.65                  | 1.37                  |
| <b>Education</b>                  |                          |          |           |                       |                       |
| Higher                            | 18 124 (96.7%)           | 18 744   |           |                       |                       |
| Lower                             | 8 332 (97.5%)            | 8 549    | 1.31      | 1.07                  | 1.61                  |
| <b>Gender</b>                     |                          |          |           |                       |                       |
| Woman                             | 18 792 (96.8%)           | 19 413   |           |                       |                       |
| Other/Undisclosed                 | 112 (91.8%)              | 122      | 0.37      | 0.16                  | 0.87                  |
| Man                               | 7 552 (97.3%)            | 7 758    | 1.21      | 0.98                  | 1.50                  |
| <b>Healthcare Experience</b>      |                          |          |           |                       |                       |
| No                                | 16 363 (97.5%)           | 16 791   |           |                       |                       |
| Yes                               | 10 093 (96.1%)           | 10 502   | 0.65      | 0.54                  | 0.77                  |
| <b>Illness Experience</b>         |                          |          |           |                       |                       |
| No                                | 15 739 (96.7%)           | 16 271   |           |                       |                       |
| Yes                               | 10 717 (97.2%)           | 11 022   | 1.19      | 0.98                  | 1.43                  |
| <b>Mental Health</b>              |                          |          |           |                       |                       |
| Average or above                  | 23 008 (97.1%)           | 23 693   |           |                       |                       |
| Below average                     | 3 448 (95.8%)            | 3 600    | 0.68      | 0.53                  | 0.86                  |
| <b>Relationship</b>               |                          |          |           |                       |                       |
| Not stable                        | 11 601 (96.4%)           | 12 038   |           |                       |                       |
| Stable                            | 14 855 (97.4%)           | 15 255   | 1.40      | 1.17                  | 1.68                  |

**TABLE 17: QUESTION 5B (IMAGINE YOU UNDERGO A BRAIN HEALTH TEST, AND IT SHOWS THAT YOU HAVE A RISK OF DEVELOPING BRAIN DISEASE. WHAT WOULD BE YOUR MOST LIKELY REACTION? - I WOULD SEEK ADVICE FROM FAMILY AND FRIENDS)**

| <b>Group</b>                      | <b>Positive Response</b> | <b>n</b> | <b>OR</b> | <b>Lower CI (99%)</b> | <b>Upper CI (99%)</b> |
|-----------------------------------|--------------------------|----------|-----------|-----------------------|-----------------------|
| <b>Age</b>                        |                          |          |           |                       |                       |
| >= 61                             | 6 932 (60.4%)            | 11 468   |           |                       |                       |
| <= 40                             | 3 290 (73.6%)            | 84 470   | 1.82      | 1.65                  | 2.02                  |
| 41-60                             | 6 550 (65.2%)            | 10 048   | 1.23      | 1.14                  | 1.32                  |
| <b>Brain Disease Caregiver</b>    |                          |          |           |                       |                       |
| No                                | 8 786 (63.2%)            | 13 891   |           |                       |                       |
| Yes                               | 7 986 (66.0%)            | 12 095   | 1.13      | 1.06                  | 1.21                  |
| <b>Brain Research Participant</b> |                          |          |           |                       |                       |
| No                                | 9 739 (65.7%)            | 14 816   |           |                       |                       |
| Yes                               | 7 033 (63.0%)            | 11 170   | 0.89      | 0.83                  | 0.95                  |
| <b>Cognitive Health</b>           |                          |          |           |                       |                       |
| Average or above                  | 15 820 (64.7%)           | 24 441   |           |                       |                       |
| Below average                     | 952 (61.6%)              | 1 545    | 0.87      | 0.76                  | 1.01                  |
| <b>Education</b>                  |                          |          |           |                       |                       |
| Higher                            | 11 606 (64.7%)           | 17 946   |           |                       |                       |
| Lower                             | 5 166 (64.3%)            | 8 040    | 0.98      | 0.91                  | 1.06                  |
| <b>Gender</b>                     |                          |          |           |                       |                       |
| Woman                             | 12 137 (65.5%)           | 18 520   |           |                       |                       |
| Other/Undisclosed                 | 75 (62.5%)               | 120      | 0.88      | 0.54                  | 1.43                  |
| Man                               | 4 560 (62.1%)            | 7 346    | 0.86      | 0.80                  | 0.93                  |
| <b>Healthcare Experience</b>      |                          |          |           |                       |                       |
| No                                | 10 248 (64.3%)           | 15 938   |           |                       |                       |
| Yes                               | 6 524 (64.9%)            | 10 048   | 1.03      | 0.96                  | 1.10                  |
| <b>Illness Experience</b>         |                          |          |           |                       |                       |
| No                                | 10 134 (65.3%)           | 15 526   |           |                       |                       |
| Yes                               | 6 638 (63.5%)            | 10 460   | 0.92      | 0.86                  | 0.99                  |
| <b>Mental Health</b>              |                          |          |           |                       |                       |
| Average or above                  | 14 660 (65.1%)           | 22 507   |           |                       |                       |
| Below average                     | 2 112 (60.7%)            | 3 479    | 0.83      | 0.75                  | 0.91                  |
| <b>Relationship</b>               |                          |          |           |                       |                       |
| Not stable                        | 7 449 (64.7%)            | 11 506   |           |                       |                       |
| Stable                            | 9 323 (64.4%)            | 14 480   | 0.98      | 0.92                  | 1.05                  |

**TABLE 18: QUESTION 5C (IMAGINE YOU UNDERGO A BRAIN HEALTH TEST, AND IT SHOWS THAT YOU HAVE A RISK OF DEVELOPING BRAIN DISEASE. WHAT WOULD BE YOUR MOST LIKELY REACTION? - I WOULD SEEK INFORMATION ONLINE/AT THE LIBRARY)**

| Group                             | Positive Response | n      | OR   | Lower CI (99%) | Upper CI (99%) |
|-----------------------------------|-------------------|--------|------|----------------|----------------|
| <b>Age</b>                        |                   |        |      |                |                |
| >= 61                             | 10 638 (89.5%)    | 11 882 |      |                |                |
| <= 40                             | 4 029 (90.3%)     | 4 463  | 1.09 | 0.93           | 1.26           |
| 41-60                             | 9 299 (91.6%)     | 10 152 | 1.27 | 1.13           | 1.44           |
| <b>Brain Disease Caregiver</b>    |                   |        |      |                |                |
| No                                | 12 685 (89.6%)    | 14 161 |      |                |                |
| Yes                               | 11 281 (91.4%)    | 12 336 | 1.24 | 1.12           | 1.39           |
| <b>Brain Research Participant</b> |                   |        |      |                |                |
| No                                | 13 666 (90.6%)    | 15 089 |      |                |                |
| Yes                               | 10 300 (90.3%)    | 11 408 | 0.97 | 0.87           | 1.08           |
| <b>Cognitive Health</b>           |                   |        |      |                |                |
| Average or above                  | 22 544 (90.5%)    | 24 910 |      |                |                |
| Below average                     | 1 422 (89.6%)     | 1 587  | 0.90 | 0.73           | 1.13           |
| <b>Education</b>                  |                   |        |      |                |                |
| Higher                            | 16 883 (92.3%)    | 18 297 |      |                |                |
| Lower                             | 7 083 (86.4%)     | 8 200  | 0.53 | 0.48           | 0.59           |
| <b>Gender</b>                     |                   |        |      |                |                |
| Woman                             | 17 371 (92.0%)    | 18 890 |      |                |                |
| Other/Undisclosed                 | 114 (91.2%)       | 125    | 0.91 | 0.40           | 2.05           |
| Man                               | 6 481 (86.6%)     | 7 482  | 0.57 | 0.51           | 0.63           |
| <b>Healthcare Experience</b>      |                   |        |      |                |                |
| No                                | 14 565 (89.6%)    | 16 254 |      |                |                |
| Yes                               | 9 401 (91.8%)     | 10 243 | 1.29 | 1.16           | 1.45           |
| <b>Illness Experience</b>         |                   |        |      |                |                |
| No                                | 14 331 (90.5%)    | 15 844 |      |                |                |
| Yes                               | 9 635 (90.4%)     | 10 653 | 1.00 | 0.90           | 1.12           |
| <b>Mental Health</b>              |                   |        |      |                |                |
| Average or above                  | 20 748 (90.3%)    | 22 968 |      |                |                |
| Below average                     | 3 218 (91.2%)     | 3 529  | 1.11 | 0.94           | 1.30           |
| <b>Relationship</b>               |                   |        |      |                |                |
| Not stable                        | 10 526 (89.8%)    | 11 724 |      |                |                |
| Stable                            | 13 440 (91.0%)    | 14 773 | 1.15 | 1.03           | 1.28           |

**TABLE 19: QUESTION 5D (IMAGINE YOU UNDERGO A BRAIN HEALTH TEST, AND IT SHOWS THAT YOU HAVE A RISK OF DEVELOPING BRAIN DISEASE. WHAT WOULD BE YOUR MOST LIKELY REACTION? - I WOULD CHANGE MY LIFESTYLE IF REQUIRED)**

| <b>Group</b>                      | <b>Positive Response</b> | <b>n</b> | <b>OR</b> | <b>Lower CI (99%)</b> | <b>Upper CI (99%)</b> |
|-----------------------------------|--------------------------|----------|-----------|-----------------------|-----------------------|
| <b>Age</b>                        |                          |          |           |                       |                       |
| >= 61                             | 11 993 (97.7%)           | 12 277   |           |                       |                       |
| <= 40                             | 4 364 (97.4%)            | 4 480    | 0.89      | 0.67                  | 1.19                  |
| 41-60                             | 10 052 (98.0%)           | 10 257   | 1.16      | 0.91                  | 1.47                  |
| <b>Brain Disease Caregiver</b>    |                          |          |           |                       |                       |
| No                                | 14 071 (97.5%)           | 14 437   |           |                       |                       |
| Yes                               | 12 338 (98.1%)           | 12 577   | 1.34      | 1.08                  | 1.67                  |
| <b>Brain Research Participant</b> |                          |          |           |                       |                       |
| No                                | 14 981 (97.6%)           | 15 357   |           |                       |                       |
| Yes                               | 11 428 (98.0%)           | 11 657   | 1.25      | 1.01                  | 1.56                  |
| <b>Cognitive Health</b>           |                          |          |           |                       |                       |
| Average or above                  | 24 862 (97.9%)           | 25 390   |           |                       |                       |
| Below average                     | 1 547 (95.3%)            | 1 624    | 0.43      | 0.31                  | 0.59                  |
| <b>Education</b>                  |                          |          |           |                       |                       |
| Higher                            | 18 148 (97.7%)           | 18 572   |           |                       |                       |
| Lower                             | 8 261 (97.9%)            | 8 442    | 1.07      | 0.85                  | 1.34                  |
| <b>Gender</b>                     |                          |          |           |                       |                       |
| Woman                             | 18 862 (98.0%)           | 19 244   |           |                       |                       |
| Other/Undisclosed                 | 111 (90.2%)              | 123      | 0.19      | 0.08                  | 0.41                  |
| Man                               | 7 436 (97.2%)            | 7 647    | 0.71      | 0.57                  | 0.89                  |
| <b>Healthcare Experience</b>      |                          |          |           |                       |                       |
| No                                | 16 209 (97.7%)           | 16 592   |           |                       |                       |
| Yes                               | 10 200 (97.9%)           | 10 422   | 1.09      | 0.87                  | 1.35                  |
| <b>Illness Experience</b>         |                          |          |           |                       |                       |
| No                                | 15 810 (98.0%)           | 16 127   |           |                       |                       |
| Yes                               | 10 599 (97.4%)           | 10 887   | 0.74      | 0.60                  | 0.91                  |
| <b>Mental Health</b>              |                          |          |           |                       |                       |
| Average or above                  | 22 978 (98.0%)           | 23 441   |           |                       |                       |
| Below average                     | 3 431 (96.0%)            | 3 573    | 0.49      | 0.38                  | 0.63                  |
| <b>Relationship</b>               |                          |          |           |                       |                       |
| Not stable                        | 11 605 (97.3%)           | 11 926   |           |                       |                       |
| Stable                            | 14 804 (98.1%)           | 15 088   | 1.44      | 1.17                  | 1.78                  |

**TABLE 20: QUESTION 5E (IMAGINE YOU UNDERGO A BRAIN HEALTH TEST, AND IT SHOWS THAT YOU HAVE A RISK OF DEVELOPING BRAIN DISEASE. WHAT WOULD BE YOUR MOST LIKELY REACTION? - I WOULD PLAN FOR THE FUTURE)**

| <b>Group</b>                      | <b>Positive Response</b> | <b>n</b> | <b>OR</b> | <b>Lower CI (99%)</b> | <b>Upper CI (99%)</b> |
|-----------------------------------|--------------------------|----------|-----------|-----------------------|-----------------------|
| <b>Age</b>                        |                          |          |           |                       |                       |
| >= 61                             | 11 580 (95.3%)           | 12 155   |           |                       |                       |
| <= 40                             | 4 159 (93.0%)            | 4 472    | 0.66      | 0.55                  | 0.80                  |
| 41-60                             | 9 749 (95.6%)            | 10 197   | 1.08      | 0.91                  | 1.28                  |
| <b>Brain Disease Caregiver</b>    |                          |          |           |                       |                       |
| No                                | 13 414 (93.8%)           | 14 300   |           |                       |                       |
| Yes                               | 12 074 (96.4%)           | 12 524   | 1.77      | 1.52                  | 2.06                  |
| <b>Brain Research Participant</b> |                          |          |           |                       |                       |
| No                                | 14 362 (94.3%)           | 15 236   |           |                       |                       |
| Yes                               | 11 126 (96.0%)           | 11 588   | 1.47      | 1.26                  | 1.71                  |
| <b>Cognitive Health</b>           |                          |          |           |                       |                       |
| Average or above                  | 23 996 (95.2%)           | 25 216   |           |                       |                       |
| Below average                     | 1 492 (92.8%)            | 1 608    | 0.65      | 0.50                  | 0.85                  |
| <b>Education</b>                  |                          |          |           |                       |                       |
| Higher                            | 17 680 (95.7%)           | 18 467   |           |                       |                       |
| Lower                             | 7 808 (93.4%)            | 8 357    | 0.63      | 0.55                  | 0.73                  |
| <b>Gender</b>                     |                          |          |           |                       |                       |
| Woman                             | 18 276 (95.6%)           | 19 126   |           |                       |                       |
| Other/Undisclosed                 | 105 (86.1%)              | 122      | 0.29      | 0.15                  | 0.57                  |
| Man                               | 7 107 (93.8%)            | 7 576    | 0.70      | 0.60                  | 0.82                  |
| <b>Healthcare Experience</b>      |                          |          |           |                       |                       |
| No                                | 15 565 (94.6%)           | 16 449   |           |                       |                       |
| Yes                               | 9 923 (95.6%)            | 10 375   | 1.25      | 1.07                  | 1.45                  |
| <b>Illness Experience</b>         |                          |          |           |                       |                       |
| No                                | 15 262 (95.3%)           | 16 009   |           |                       |                       |
| Yes                               | 10 226 (94.6%)           | 10 815   | 0.85      | 0.73                  | 0.98                  |
| <b>Mental Health</b>              |                          |          |           |                       |                       |
| Average or above                  | 22 216 (95.5%)           | 23 274   |           |                       |                       |
| Below average                     | 3 272 (92.2%)            | 3 550    | 0.56      | 0.47                  | 0.67                  |
| <b>Relationship</b>               |                          |          |           |                       |                       |
| Not stable                        | 11 083 (93.5%)           | 11 853   |           |                       |                       |
| Stable                            | 14 405 (96.2%)           | 14 971   | 1.77      | 1.53                  | 2.05                  |

**TABLE 21: QUESTION 6A (BRAIN HEALTH TEST SHOULD BE AFFORDABLE)**

| <b>Group</b>                      | <b>Positive Response</b> | <b>n</b> | <b>OR</b> | <b>Lower CI (99%)</b> | <b>Upper CI (99%)</b> |
|-----------------------------------|--------------------------|----------|-----------|-----------------------|-----------------------|
| <b>Age</b>                        |                          |          |           |                       |                       |
| >= 61                             | 6 138 (48.1%)            | 12 760   |           |                       |                       |
| 41-60                             | 4 846 (46.9%)            | 10 328   | 0.95      | 0.89                  | 1.02                  |
| <= 40                             | 2 532 (56.2%)            | 4 502    | 1.39      | 1.27                  | 1.52                  |
| <b>Brain Disease</b>              |                          |          |           |                       |                       |
| <b>Caregiver</b>                  |                          |          |           |                       |                       |
| No                                | 7 225 (48.9%)            | 14 762   |           |                       |                       |
| Yes                               | 6 291 (49.0%)            | 12 828   | 1.00      | 0.94                  | 1.07                  |
| <b>Brain Research Participant</b> |                          |          |           |                       |                       |
| No                                | 7 549 (48.2%)            | 15 671   |           |                       |                       |
| Yes                               | 5 967 (50.1%)            | 11 919   | 1.08      | 1.01                  | 1.15                  |
| <b>Cognitive Health</b>           |                          |          |           |                       |                       |
| Average or above                  | 12 696 (49.0%)           | 25 929   |           |                       |                       |
| Below average                     | 820 (49.4%)              | 1 661    | 1.02      | 0.89                  | 1.16                  |
| <b>Education</b>                  |                          |          |           |                       |                       |
| Higher                            | 9 311 (49.2%)            | 18 925   |           |                       |                       |
| Lower                             | 4 205 (48.5%)            | 8 665    | 0.97      | 0.91                  | 1.04                  |
| <b>Gender</b>                     |                          |          |           |                       |                       |
| Woman                             | 9 429 (48.0%)            | 19 626   |           |                       |                       |
| Man                               | 4 014 (51.2%)            | 7 833    | 1.14      | 1.06                  | 1.22                  |
| Other/Undisclosed                 | 73 (55.7%)               | 131      | 1.36      | 0.86                  | 2.15                  |
| <b>Healthcare Experience</b>      |                          |          |           |                       |                       |
| No                                | 8 379 (49.4%)            | 16 955   |           |                       |                       |
| Yes                               | 5 137 (48.3%)            | 10 635   | 0.96      | 0.90                  | 1.02                  |
| <b>Illness Experience</b>         |                          |          |           |                       |                       |
| No                                | 8 264 (50.2%)            | 16 451   |           |                       |                       |
| Yes                               | 5 252 (47.1%)            | 11 139   | 0.88      | 0.83                  | 0.94                  |
| <b>Mental Health</b>              |                          |          |           |                       |                       |
| Average or above                  | 11 664 (48.7%)           | 23 958   |           |                       |                       |
| Below average                     | 1 852 (51.0%)            | 3 632    | 1.10      | 1.00                  | 1.20                  |
| <b>Relationship</b>               |                          |          |           |                       |                       |
| Not stable                        | 6 035 (49.6%)            | 12 177   |           |                       |                       |
| Stable                            | 7 481 (48.5%)            | 15 413   | 0.96      | 0.90                  | 1.02                  |

TABLE 22: QUESTION 6B (BRAIN HEALTH TEST SHOULD BE QUICK TO TAKE)

| Group                             | Positive Response | n      | OR   | Lower CI (99%) | Upper CI (99%) |
|-----------------------------------|-------------------|--------|------|----------------|----------------|
| <b>Age</b>                        |                   |        |      |                |                |
| Age >= 61                         | 3 871 (30.3%)     | 12 760 |      |                |                |
| <= 40                             | 1 182 (26.3%)     | 4 502  | 0.82 | 0.74           | 0.90           |
| 41-60                             | 3 221 (31.2%)     | 10 328 | 1.04 | 0.97           | 1.12           |
| <b>Brain Disease</b>              |                   |        |      |                |                |
| <b>Caregiver</b>                  |                   |        |      |                |                |
| No                                | 4 434 (30.0%)     | 14 762 |      |                |                |
| Yes                               | 3 840 (29.9%)     | 12 828 | 1.00 | 0.93           | 1.07           |
| <b>Brain Research Participant</b> |                   |        |      |                |                |
| No                                | 4 890 (31.2%)     | 15 671 |      |                |                |
| Yes                               | 3 384 (28.4%)     | 11 919 | 0.87 | 0.82           | 0.94           |
| <b>Cognitive Health</b>           |                   |        |      |                |                |
| Average or above                  | 7 847 (30.3%)     | 25 929 |      |                |                |
| Below average                     | 427 (25.7%)       | 1 661  | 0.80 | 0.69           | 0.93           |
| <b>Education</b>                  |                   |        |      |                |                |
| Higher                            | 5 606 (29.6%)     | 18 925 |      |                |                |
| Lower                             | 2 668 (30.8%)     | 8 665  | 1.06 | 0.98           | 1.14           |
| <b>Gender</b>                     |                   |        |      |                |                |
| Woman                             | 5 660 (28.8%)     | 19 626 |      |                |                |
| Other/Undisclosed                 | 27 (20.6%)        | 131    | 0.64 | 0.37           | 1.12           |
| Man                               | 2 587 (33.0%)     | 7 833  | 1.22 | 1.13           | 1.31           |
| <b>Healthcare Experience</b>      |                   |        |      |                |                |
| No                                | 5 056 (29.8%)     | 16 955 |      |                |                |
| Yes                               | 3 218 (30.3%)     | 10 635 | 1.02 | 0.95           | 1.09           |
| <b>Illness Experience</b>         |                   |        |      |                |                |
| No                                | 5 015 (30.5%)     | 16 451 |      |                |                |
| Yes                               | 3 259 (29.3%)     | 11 139 | 0.94 | 0.88           | 1.01           |
| <b>Mental Health</b>              |                   |        |      |                |                |
| Average or above                  | 7 320 (30.6%)     | 23 958 |      |                |                |
| Below average                     | 954 (26.3%)       | 3 632  | 0.81 | 0.73           | 0.90           |
| <b>Relationship</b>               |                   |        |      |                |                |
| Not stable                        | 3 441 (28.3%)     | 12 177 |      |                |                |
| Stable                            | 4 833 (31.4%)     | 15 413 | 1.16 | 1.08           | 1.24           |



**TABLE 23: QUESTION 6C (BRAIN HEALTH TEST SHOULD BE ACCURATE)**

| <b>Group</b>                      | <b>Positive Response</b> | <b>n</b> | <b>OR</b> | <b>Lower CI (99%)</b> | <b>Upper CI (99%)</b> |
|-----------------------------------|--------------------------|----------|-----------|-----------------------|-----------------------|
| <b>Age</b>                        |                          |          |           |                       |                       |
| >= 61                             | 10 826 (84.8%)           | 12 760   |           |                       |                       |
| <= 40                             | 3 508 (77.9%)            | 4 502    | 0.63      | 0.56                  | 0.71                  |
| 41-60                             | 8 542 (82.7%)            | 10 328   | 0.85      | 0.78                  | 0.94                  |
| <b>Brain Disease Caregiver</b>    |                          |          |           |                       |                       |
| No                                | 11 992 (81.2%)           | 14 762   |           |                       |                       |
| Yes                               | 10 884 (84.8%)           | 12 828   | 1.29      | 1.19                  | 1.41                  |
| <b>Brain Research Participant</b> |                          |          |           |                       |                       |
| No                                | 12 545 (80.1%)           | 15 671   |           |                       |                       |
| Yes                               | 10 331 (86.7%)           | 11 919   | 1.62      | 1.49                  | 1.77                  |
| <b>Cognitive Health</b>           |                          |          |           |                       |                       |
| Average or above                  | 21 529 (83.0%)           | 25 929   |           |                       |                       |
| Below average                     | 1 347 (81.1%)            | 1 661    | 0.88      | 0.74                  | 1.04                  |
| <b>Education</b>                  |                          |          |           |                       |                       |
| Higher                            | 15 787 (83.4%)           | 18 925   |           |                       |                       |
| Lower                             | 7 089 (81.8%)            | 8 665    | 0.89      | 0.82                  | 0.98                  |
| <b>Gender</b>                     |                          |          |           |                       |                       |
| Woman                             | 16 417 (83.6%)           | 19 626   |           |                       |                       |
| Other/Undisclosed                 | 100 (76.3%)              | 131      | 0.63      | 0.37                  | 1.07                  |
| Man                               | 6 359 (81.2%)            | 7 833    | 0.84      | 0.77                  | 0.92                  |
| <b>Healthcare Experience</b>      |                          |          |           |                       |                       |
| No                                | 13 943 (82.2%)           | 16 955   |           |                       |                       |
| Yes                               | 8 933 (84.0%)            | 10 635   | 1.13      | 1.04                  | 1.24                  |
| <b>Illness Experience</b>         |                          |          |           |                       |                       |
| No                                | 13 640 (82.9%)           | 16 451   |           |                       |                       |
| Yes                               | 9 236 (82.9%)            | 11 139   | 1.00      | 0.92                  | 1.09                  |
| <b>Mental Health</b>              |                          |          |           |                       |                       |
| Average or above                  | 19 919 (83.1%)           | 23 958   |           |                       |                       |
| Below average                     | 2 957 (81.4%)            | 3 632    | 0.89      | 0.79                  | 1.00                  |
| <b>Relationship</b>               |                          |          |           |                       |                       |
| Not stable                        | 9 913 (81.4%)            | 12 177   |           |                       |                       |
| Stable                            | 12 963 (84.1%)           | 15 413   | 1.21      | 1.11                  | 1.31                  |

TABLE 24: QUESTION 6D (BRAIN HEALTH TEST SHOULD BE PAINLESS)

| Group                             | Positive Response | n      | OR   | Lower CI (99%) | Upper CI (99%) |
|-----------------------------------|-------------------|--------|------|----------------|----------------|
| <b>Age</b>                        |                   |        |      |                |                |
| >= 61                             | 4 009 (31.4%)     | 12 760 |      |                |                |
| 41-60                             | 3 727 (36.1%)     | 10 328 | 1.23 | 1.15           | 1.32           |
| <= 40                             | 1 967 (43.7%)     | 4 502  | 1.69 | 1.55           | 1.86           |
| <b>Brain Disease</b>              |                   |        |      |                |                |
| <b>Caregiver</b>                  |                   |        |      |                |                |
| No                                | 5 453 (36.9%)     | 14 762 |      |                |                |
| Yes                               | 4 250 (33.1%)     | 12 828 | 0.85 | 0.79           | 0.90           |
| <b>Brain Research Participant</b> |                   |        |      |                |                |
| No                                | 5 625 (35.9%)     | 15 671 |      |                |                |
| Yes                               | 4 078 (34.2%)     | 11 919 | 0.93 | 0.87           | 0.99           |
| <b>Cognitive Health</b>           |                   |        |      |                |                |
| Average or above                  | 9 205 (35.5%)     | 25 929 |      |                |                |
| Below average                     | 498 (30.0%)       | 1 661  | 0.78 | 0.67           | 0.90           |
| <b>Education</b>                  |                   |        |      |                |                |
| Higher                            | 6 746 (35.6%)     | 18 925 |      |                |                |
| Lower                             | 2 957 (34.1%)     | 8 665  | 0.94 | 0.87           | 1.00           |
| <b>Gender</b>                     |                   |        |      |                |                |
| Woman                             | 6 990 (35.6%)     | 19 626 |      |                |                |
| Other/Undisclosed                 | 54 (41.2%)        | 131    | 1.27 | 0.80           | 2.01           |
| Man                               | 2 659 (33.9%)     | 7 833  | 0.93 | 0.86           | 1.00           |
| <b>Healthcare Experience</b>      |                   |        |      |                |                |
| No                                | 6 153 (36.3%)     | 16 955 |      |                |                |
| Yes                               | 3 550 (33.4%)     | 10 635 | 0.88 | 0.82           | 0.94           |
| <b>Illness Experience</b>         |                   |        |      |                |                |
| No                                | 5 938 (36.1%)     | 16 451 |      |                |                |
| Yes                               | 3 765 (33.8%)     | 11 139 | 0.90 | 0.85           | 0.97           |
| <b>Mental Health</b>              |                   |        |      |                |                |
| Average or above                  | 8 417 (35.1%)     | 23 958 |      |                |                |
| Below average                     | 1 286 (35.4%)     | 3 632  | 1.01 | 0.92           | 1.11           |
| <b>Relationship</b>               |                   |        |      |                |                |
| Not stable                        | 4 446 (36.5%)     | 12 177 |      |                |                |
| Stable                            | 5 257 (34.1%)     | 15 413 | 0.90 | 0.84           | 0.96           |

TABLE 25: QUESTION 6E (BRAIN HEALTH TEST SHOULD BE SUBSIDIZED BY SOCIAL SECURITY)

| Group                             | Positive Response | n      | OR   | Lower CI (99%) | Upper CI (99%) |
|-----------------------------------|-------------------|--------|------|----------------|----------------|
| <b>Age</b>                        |                   |        |      |                |                |
| >= 61                             | 5 670 (44.4%)     | 12 760 |      |                |                |
| 41-60                             | 4 908 (47.5%)     | 10 328 | 1.13 | 1.06           | 1.21           |
| <= 40                             | 2 235 (49.6%)     | 4 502  | 1.23 | 1.13           | 1.35           |
| <b>Brain Disease Caregiver</b>    |                   |        |      |                |                |
| No                                | 7 017 (47.5%)     | 14 762 |      |                |                |
| Yes                               | 5 796 (45.2%)     | 12 828 | 0.91 | 0.85           | 0.97           |
| <b>Brain Research Participant</b> |                   |        |      |                |                |
| No                                | 7 592 (48.4%)     | 15 671 |      |                |                |
| Yes                               | 5 221 (43.8%)     | 11 919 | 0.83 | 0.78           | 0.88           |
| <b>Cognitive Health</b>           |                   |        |      |                |                |
| Average or above                  | 11 948 (46.1%)    | 25 929 |      |                |                |
| Below average                     | 865 (52.1%)       | 1 661  | 1.27 | 1.12           | 1.45           |
| <b>Education</b>                  |                   |        |      |                |                |
| Higher                            | 8 461 (44.7%)     | 18 925 |      |                |                |
| Lower                             | 4 352 (50.2%)     | 8 665  | 1.25 | 1.17           | 1.33           |
| <b>Gender</b>                     |                   |        |      |                |                |
| Woman                             | 9 351 (47.6%)     | 19 626 |      |                |                |
| Other/Undisclosed                 | 61 (46.6%)        | 131    | 0.96 | 0.61           | 1.51           |
| Man                               | 3 401 (43.4%)     | 7 833  | 0.84 | 0.79           | 0.90           |
| <b>Healthcare Experience</b>      |                   |        |      |                |                |
| No                                | 7 762 (45.8%)     | 16 955 |      |                |                |
| Yes                               | 5 051 (47.5%)     | 10 635 | 1.07 | 1.00           | 1.14           |
| <b>Illness Experience</b>         |                   |        |      |                |                |
| No                                | 7 279 (44.2%)     | 16 451 |      |                |                |
| Yes                               | 5 534 (49.7%)     | 11 139 | 1.24 | 1.17           | 1.33           |
| <b>Mental Health</b>              |                   |        |      |                |                |
| Average or above                  | 10 977 (45.8%)    | 23 958 |      |                |                |
| Below average                     | 1 836 (50.6%)     | 3 632  | 1.21 | 1.10           | 1.33           |
| <b>Relationship</b>               |                   |        |      |                |                |
| Not stable                        | 6 127 (50.3%)     | 12 177 |      |                |                |
| Stable                            | 6 686 (43.4%)     | 15 413 | 0.76 | 0.71           | 0.81           |

TABLE 26: QUESTION 6F (BRAIN HEALTH TEST SHOULD BE OFFERED ONLINE)

| Group                             | Positive Response | n      | OR   | Lower (99%) | CI | Upper (99%) | CI |
|-----------------------------------|-------------------|--------|------|-------------|----|-------------|----|
| <b>Age</b>                        |                   |        |      |             |    |             |    |
| >= 61                             | 4 084 (32.0%)     | 12 760 |      |             |    |             |    |
| <= 40                             | 886 (19.7%)       | 4 502  | 0.52 | 0.47        |    | 0.58        |    |
| 41-60                             | 2 709 (26.2%)     | 10 328 | 0.76 | 0.70        |    | 0.81        |    |
| <b>Brain Disease</b>              |                   |        |      |             |    |             |    |
| <b>Caregiver</b>                  |                   |        |      |             |    |             |    |
| No                                | 4 046 (27.4%)     | 14 762 |      |             |    |             |    |
| Yes                               | 3 633 (28.3%)     | 12 828 | 1.05 | 0.98        |    | 1.12        |    |
| <b>Brain Research Participant</b> |                   |        |      |             |    |             |    |
| No                                | 4 237 (27.0%)     | 15 671 |      |             |    |             |    |
| Yes                               | 3 442 (28.9%)     | 11 919 | 1.10 | 1.02        |    | 1.17        |    |
| <b>Cognitive Health</b>           |                   |        |      |             |    |             |    |
| Average or above                  | 7 156 (27.6%)     | 25 929 |      |             |    |             |    |
| Below average                     | 523 (31.5%)       | 1 661  | 1.21 | 1.05        |    | 1.39        |    |
| <b>Education</b>                  |                   |        |      |             |    |             |    |
| Higher                            | 5 226 (27.6%)     | 18 925 |      |             |    |             |    |
| Lower                             | 2 453 (28.3%)     | 8 665  | 1.04 | 0.96        |    | 1.12        |    |
| <b>Gender</b>                     |                   |        |      |             |    |             |    |
| Woman                             | 5 390 (27.5%)     | 19 626 |      |             |    |             |    |
| Other/Undisclosed                 | 28 (21.4%)        | 131    | 0.72 | 0.41        |    | 1.25        |    |
| Man                               | 2 261 (28.9%)     | 7 833  | 1.07 | 0.99        |    | 1.16        |    |
| <b>Healthcare Experience</b>      |                   |        |      |             |    |             |    |
| No                                | 4 814 (28.4%)     | 16 955 |      |             |    |             |    |
| Yes                               | 2 865 (26.9%)     | 10 635 | 0.93 | 0.87        |    | 1.00        |    |
| <b>Illness Experience</b>         |                   |        |      |             |    |             |    |
| No                                | 4 558 (27.7%)     | 16 451 |      |             |    |             |    |
| Yes                               | 3 121 (28.0%)     | 11 139 | 1.02 | 0.95        |    | 1.09        |    |
| <b>Mental Health</b>              |                   |        |      |             |    |             |    |
| Average or above                  | 6 769 (28.3%)     | 23 958 |      |             |    |             |    |
| Below average                     | 910 (25.1%)       | 3 632  | 0.85 | 0.76        |    | 0.94        |    |
| <b>Relationship</b>               |                   |        |      |             |    |             |    |
| Not stable                        | 3 171 (26.0%)     | 12 177 |      |             |    |             |    |
| Stable                            | 4 508 (29.3%)     | 15 413 | 1.17 | 1.09        |    | 1.26        |    |

TABLE 27: QUESTION 6G (BRAIN HEALTH TEST SHOULD HAVE [OTHER] CHARACTERISTIC)

| Group                             | Positive Response | n      | OR   | Lower CI (99%) | Upper CI (99%) |
|-----------------------------------|-------------------|--------|------|----------------|----------------|
| <b>Age &gt;=</b>                  |                   |        |      |                |                |
| Age >= 61                         | 652 (5.1%)        | 12 760 |      |                |                |
| <= 40                             | 229 (5.1%)        | 4 502  | 1.00 | 0.81           | 1.22           |
| 41-60                             | 567 (5.5%)        | 10 328 | 1.08 | 0.93           | 1.26           |
| <b>Brain Disease Caregiver</b>    |                   |        |      |                |                |
| No                                | 660 (4.5%)        | 14 762 |      |                |                |
| Yes                               | 788 (6.1%)        | 12 828 | 1.40 | 1.22           | 1.61           |
| <b>Brain Research Participant</b> |                   |        |      |                |                |
| No                                | 756 (4.8%)        | 15 671 |      |                |                |
| Yes                               | 692 (5.8%)        | 11 919 | 1.22 | 1.06           | 1.40           |
| <b>Cognitive Health</b>           |                   |        |      |                |                |
| Average or above                  | 1 357 (5.2%)      | 25 929 |      |                |                |
| Below average                     | 91 (5.5%)         | 1 661  | 1.05 | 0.79           | 1.40           |
| <b>Education</b>                  |                   |        |      |                |                |
| Higher                            | 1 145 (6.1%)      | 18 925 |      |                |                |
| Lower                             | 303 (3.5%)        | 8 665  | 0.56 | 0.47           | 0.67           |
| <b>Gender</b>                     |                   |        |      |                |                |
| Woman                             | 1 036 (5.3%)      | 19 626 |      |                |                |
| Other/Undisclosed                 | 9 (6.9%)          | 131    | 1.32 | 0.54           | 3.24           |
| Man                               | 403 (5.1%)        | 7 833  | 0.97 | 0.83           | 1.14           |
| <b>Healthcare Experience</b>      |                   |        |      |                |                |
| No                                | 843 (5.0%)        | 16 955 |      |                |                |
| Yes                               | 605 (5.7%)        | 10 635 | 1.15 | 1.00           | 1.33           |
| <b>Illness Experience</b>         |                   |        |      |                |                |
| No                                | 772 (4.7%)        | 16 451 |      |                |                |
| Yes                               | 676 (6.1%)        | 11 139 | 1.31 | 1.14           | 1.51           |
| <b>Mental Health</b>              |                   |        |      |                |                |
| Average or above                  | 1 217 (5.1%)      | 23 958 |      |                |                |
| Below average                     | 231 (6.4%)        | 3 632  | 1.27 | 1.05           | 1.54           |
| <b>Relationship</b>               |                   |        |      |                |                |
| Not stable                        | 656 (5.4%)        | 12 177 |      |                |                |
| Stable                            | 792 (5.1%)        | 15 413 | 0.95 | 0.83           | 1.09           |
